# Supplementary material
Source: MDPI journal article supplement (https://www.mdpi.com/1424-2818/13/6/263)
Supplement: s1 [file s1]

**Table S1.** New Mexican *Lupinus* ITS sequences accession numbers

| Sample                | Species                                  | Date       | Place                                                                                            | Altitude (m a.s. l.) | No. voucher  | Author          | Sequencing technology                                | GenBank Accession              |                                |
|-----------------------|------------------------------------------|------------|--------------------------------------------------------------------------------------------------|----------------------|--------------|-----------------|------------------------------------------------------|--------------------------------|--------------------------------|
|                       |                                          |            |                                                                                                  |                      |              |                 |                                                      | ITS 1 (240bp)                  | ITS 2 (220bp)                  |
| Lupinus_elegans       | <i>Lupinus elegans</i> Kunth             |            |                                                                                                  |                      |              | Michael Wink    |                                                      | Z72170                         | Z72171                         |
| Lupinus rotundiflorus | <i>Lupinus rotundiflorus</i> M. E. Jones |            | Jalisco, México                                                                                  |                      |              | Michael Wink    |                                                      | MZ351214                       | MZ351207                       |
| Lupinus_pubescens     | <i>Lupinus pubescens</i> Benth.          |            |                                                                                                  |                      |              | Michael Wink    |                                                      | Z72178                         | Z72179                         |
| L_guadalajara_Pg      | <i>Lupinus guadalajara</i>               |            | Pedro García                                                                                     |                      |              | Kalina Bermúdez | AlfExpress II DNA Sequencer AMV 3.0/ALF WIN V v. 1.0 | This sample was not identified | This sample was not identified |
| L_mexicanus_MEXU_A    | <i>Lupinus mexicanus</i> Cerv. ex Lag.   |            | MEXU Herbario Nacional de México, Instituto de Biología, Universidad Nacional Autónoma de México |                      |              | Kalina Bermúdez | AlfExpress II DNA Sequencer AMV 3.0/ALF WIN V v. 1.0 | MZ352949                       | MZ352960                       |
| L_montanus_90_35      | <i>Lupinus montanus</i> Kunth            | 04/08/1997 | Paso de Cortés, Estado de México, México.                                                        | 2500                 | MEXU 1297279 | Kalina Bermúdez | AlfExpress II DNA Sequencer AMV 3.0/ALF WIN V v. 1.0 | MZ352950                       | MZ352961                       |
| L_geophilusE          | <i>Lupinus geophilus</i> Greene          | 17/08/1998 | Ajusco, Estado de México, México                                                                 | 3480                 |              | Kalina Bermúdez | AlfExpress II DNA Sequencer AMV 3.0/ALF WIN V v. 1.0 | MZ352951                       | MZ352962                       |
| L_reflexus_H          | <i>Lupinus reflexus</i> Rose             |            | MEXU Herbario Nacional de México, Instituto de Biología, Universidad Nacional Autónoma de México |                      |              | Kalina Bermúdez | AlfExpress II DNA Sequencer AMV 3.0/ALF WIN V v. 1.0 | MZ352952                       | MZ352963                       |
| L_aschenbornii88/3_67 | <i>Lupinus aschenbornii</i> S. Schauer   | 04/08/1997 | Faldas del Popocatepetl                                                                          | 2480                 | MEXU 1297311 | Kalina Bermúdez | AlfExpress II DNA Sequencer AMV 3.0/ALF WIN V v. 1.0 | MZ352953                       | MZ352964                       |
| L_hintonii_58_9       | <i>Lupinus hintonii</i> C.P. Sm.         | 20/05/1996 | Tres Marías, Morelos, México                                                                     | 3000                 | MEXU 1347555 | Kalina Bermúdez | AlfExpress II DNA Sequencer AMV                      | MZ352954                       | MZ352965                       |

|                      |                                           |            |                                               |      |  |                 |                                                         |          |          |
|----------------------|-------------------------------------------|------------|-----------------------------------------------|------|--|-----------------|---------------------------------------------------------|----------|----------|
|                      |                                           |            |                                               |      |  |                 | 3.0/ALF WIN V v.<br>1.0                                 |          |          |
| L_bilineatus_100_105 | <i>Lupinus bilineatus</i> Benth.          | 29/09/1997 | Tetela del Volcán-Hueyapan, Morelos, México   | 2500 |  | Kalina Bermúdez | AlfExpress II DNA Sequencer AMV 3.0/ALF WIN V v.<br>1.0 | MZ352955 | MZ352966 |
| L_hartwegii_96_102   | <i>Lupinus hartwegii</i> Lindl.           | 22/09/1997 | Carretera Oaxtepec-Xochimilco México, México  | N.D. |  | Kalina Bermúdez | AlfExpress II DNA Sequencer AMV 3.0/ALF WIN V v.<br>1.0 | MZ352956 | MZ352967 |
| L_stipulatus_36_46   | <i>Lupinus stipulatus</i> J. Agardh       | 24/11/1995 | Tlalama-San Tetelco, Estado de México, México | 2200 |  | Kalina Bermúdez | AlfExpress II DNA Sequencer AMV 3.0/ALF WIN V v.<br>1.0 | MZ352957 | MZ352968 |
| L_splendens_106/3_85 | <i>Lupinus splendens</i> Rose             | 06/10/1997 | CICS, CDMX, México                            | N.D. |  | Kalina Bermúdez | AlfExpress II DNA Sequencer AMV 3.0/ALF WIN V v.<br>1.0 | MZ352958 | MZ352969 |
| L_exaltatus_87/2_26  | <i>Lupinus exaltatus</i> Zucc.            | 04/08/1997 | Popocatepetl, Estado de México, México        | 2486 |  | Kalina Bermúdez | AlfExpress II DNA Sequencer AMV 3.0/ALF WIN V v.<br>1.0 | MZ352959 | MZ352970 |
| Lupinus_campestris   | <i>Lupinus campestris</i> Cham. & Schltdl |            | México                                        |      |  | Michael Wink    |                                                         | MZ351215 | MZ351208 |
